# Supplementary material for: Neurobehavioral Effects of Low-Dose Chronic Exposure to Insecticides: A Review
Source: MDPI journal article supplement (doi:10.3390/toxics11020192), 2023-02-19
Supplement: s1 [file s1]

## Supplementary Materials

**Table S1.** A summary of neurobehavioral tests and questionnaires used in the selected articles.

| Function                                                                                        | Name of test                                                                                              | Target population (age of exposed)                           | References *(edition of the test)                                                                                                                                                                                                                                                                                                                                                                                              |
|-------------------------------------------------------------------------------------------------|-----------------------------------------------------------------------------------------------------------|--------------------------------------------------------------|--------------------------------------------------------------------------------------------------------------------------------------------------------------------------------------------------------------------------------------------------------------------------------------------------------------------------------------------------------------------------------------------------------------------------------|
| Neurobehavioral test sets for at least 3 domains most frequently used in studies                |                                                                                                           |                                                              |                                                                                                                                                                                                                                                                                                                                                                                                                                |
| Verbal Comprehension, Perceptual Reasoning, Working Memory, and Processing Speed. Full scale IQ | Wechsler Intelligence Scale for Children, 4th edition (WISC-IV)                                           | Non-occupational (school age children)                       | van Wendel de Joode B. et al, 2016; Rowe C. et al, 2016; Gunier R. et al, 2018; Gaspar F. et al, 2015; Bouchard M. et al, 2011; Furlong M. et al, 2017; Engel S. et al, 2011; Sagiv S. et al, 2012 (3 <sup>rd</sup> edition); Andersen H. et al, 2014 (Revised edition); Viel J. et al, 2015; Cartier C. et al, 2016; Rauh V. et al, 2015; Horton M. et al, 2012; Gonzalez-Alzaga B. et al, 2015;                              |
| Mental development index (MDI), Psychomotor development index (PDI)                             | Bayley Scales of Infant Development, 2nd edition                                                          | Non-occupational (infants)                                   | Eskenazi B. et al, 2010; Engel S. et al, 2011; Watkins D. et al, 2016; Lovasi G. et al, 2011; Horton M. et al, 2012; Woskie S. et al, 2017 (3 <sup>rd</sup> edition); Donauer S. et al, 2016; Yamazaki K. et al, 2017; J. Forns et al, 2012; Llop S. et al 2013 (1 <sup>st</sup> edition); Torres-Sánchez L. et al, 2009; Bahena-Medina et al., 2011; Eskenazi B. et al., 2018; Jusko TA et al, 2012 (1 <sup>st</sup> edition) |
| Neurodevelopment                                                                                | Brazelton Neonatal Behavioral Assessment Scale (NBAS), Neonatal Behavioral Neurological Assessment (NBNA) | Non-occupational (neonates, infant)                          | Woskie S. et al, 2017; Zhang Y et al. 2015; Bahena-Medina et al., 2011                                                                                                                                                                                                                                                                                                                                                         |
| Behavioral problems, cognitive                                                                  | A Developmental NEuroPSYchological Assessment (NEPSY-II)                                                  | Non-occupational (children)                                  | Rowe C. et al, 2016; Suarez-Lopez J et al, 2013; Sagiv S. et al, 2012                                                                                                                                                                                                                                                                                                                                                          |
| Neurodevelopment                                                                                | Ages and stages questionnaire (parent report)                                                             | Non-occupational (infant)                                    | Cordier S et al, 2015;                                                                                                                                                                                                                                                                                                                                                                                                         |
| Attention, response speed, memory, and coordination                                             | Behavioral Assessment and Research System (BARS)                                                          | Occupational, non-occupational (children, adolescent; adult) | Ismail A. et al, 2017; Butler-Dawson J et al, 2016; Fiedler N. et al, 2015; Ismail AA et al, 2018;                                                                                                                                                                                                                                                                                                                             |
| Neurobehavioral function                                                                        | WHO recommended neurobehavioral core test battery (NCTB)                                                  | Occupational (adult)                                         | Cui M et al, 2015                                                                                                                                                                                                                                                                                                                                                                                                              |
| Cognitive function test sets most frequently used in studies                                    |                                                                                                           |                                                              |                                                                                                                                                                                                                                                                                                                                                                                                                                |
| Cognitive impairment                                                                            | Mini-Mental State Examination (MMSE)                                                                      | Occupational, non-occupational (adult, elderly)              | Corral S. et al, 2017; Munoz-Quezada M. et al, 2013; Baldi I et al, 2011; Bayrami M. et al, 2012; Berent S et al, 2014; Paul KC et al, 2018; Blanc-Lapierre A. et al, 2012;                                                                                                                                                                                                                                                    |
| Visuospatial construction and visual memory                                                     | Rey-Osterrieth Complex Figure Test (ROCF)                                                                 | Occupational, non-occupational (children, adult)             | Corral S. et al, 2017; Munoz-Quezada M. et al, 2016; van Wendel de Joode B. et al, 2016                                                                                                                                                                                                                                                                                                                                        |
| Intelligence and cognitive ability                                                              | Wechsler Adult Intelligence Scale Revised (WAIS-R)                                                        | Occupational (adolescent, adult)                             | Munoz-Quezada M. et al, 2016; Ismail A. et al, 2017; Abdel Rasoul G. et al, 2008;                                                                                                                                                                                                                                                                                                                                              |
| Visual perception, visual memory                                                                | Benton visual retention test (BVRT)                                                                       | Occupational (adolescent, adult)                             | Munoz-Quezada M. et al, 2016; Rohlman D. et al, 2014; Baldi I et al, 2011; Blanc-Lapierre A. et al, 2012;                                                                                                                                                                                                                                                                                                                      |
| Cognitive function                                                                              | Digit Symbol Substitution Test (DSST)                                                                     | Occupational, non-occupational (adult, elderly)              | Starks S. et al, 2012; Krieg EF 2013;                                                                                                                                                                                                                                                                                                                                                                                          |
| Memory and attention                                                                            | Digit span test (DST)                                                                                     | Occupational, non-occupational (children, adolescent, adult) | Corral S. et al, 2017; Rohlman D. et al, 2014; Harari R. et al, 2010                                                                                                                                                                                                                                                                                                                                                           |
| Cognitive function                                                                              | McCarthy Scales of Children's Abilities                                                                   | Non-occupational (children)                                  | Torres-Sánchez L. et al, 2009; Osorio-Valencia E. et al, 2015; Puertas R. et al, 2010                                                                                                                                                                                                                                                                                                                                          |
| Motor function test sets most frequently used in studies                                        |                                                                                                           |                                                              |                                                                                                                                                                                                                                                                                                                                                                                                                                |
| Manual motor speed                                                                              | Finger Tapping Test                                                                                       | Occupational, non-occupational (children, adult)             | Andersen H. et al, 2015; Baldi I. et al, 2011; Blanc-Lapierre A. et al, 2012; Starks S. et al, 2012; Harari R. et al, 2010                                                                                                                                                                                                                                                                                                     |
| Psychological function test sets                                                                |                                                                                                           |                                                              |                                                                                                                                                                                                                                                                                                                                                                                                                                |

[illegible]

|                                        |                                                                                                                                                                                                                                                                                                                                                                                                                                                                                                                                                                                                                                                                                                                                                                                                                                                                                |                             |                                                                                                                                                                                                                                                                                                                                                                                                                          |
|----------------------------------------|--------------------------------------------------------------------------------------------------------------------------------------------------------------------------------------------------------------------------------------------------------------------------------------------------------------------------------------------------------------------------------------------------------------------------------------------------------------------------------------------------------------------------------------------------------------------------------------------------------------------------------------------------------------------------------------------------------------------------------------------------------------------------------------------------------------------------------------------------------------------------------|-----------------------------|--------------------------------------------------------------------------------------------------------------------------------------------------------------------------------------------------------------------------------------------------------------------------------------------------------------------------------------------------------------------------------------------------------------------------|
|                                        | <p>Otoscopy, audiometry, random gap detection test, dichotic digit test</p> <p>Postural control test</p> <p>Transient Evoked Otoacoustic Emissions (TEOAE) and Distortion Product Otoacoustic Emissions (DPOAE)</p> <p>Visual evoked potentials</p> <p>Peabody Developmental Motor Scales (PDMS-2)</p> <p>Eye-Hand Coordination subtest of the Frostig Developmental Test of Visual Perception, 2nd edition (DTVP-2)</p> <p>Wide Range Assessment of Visual Motor Ability (WRAVMA) pegboard test</p> <p>Snellen chart, Lanthony Desaturated D-15 (LDD-15)</p> <p>Teller acuity card (TAC), Auditory brainstem response (ABR)</p> <p>Odor identification; odor threshold;</p> <p>Fagan test of infant intelligence (FTII),</p> <p>Brunet-Lezine scale of psychomotor development of early childhood (revised Brunet-Lezine)</p>                                                 | Non occupational (children) | <p>Alcarás PAS et al, 2013;</p> <p>Cartier C. et al, 2014</p> <p>Silver M. et al, 2017</p> <p>van Wendel de Joode B. et al, 2016;</p> <p>Sturza J. et al, 2016</p> <p>Quandt SA et al, 2017</p> <p>Dallaire R. et al, 2012</p>                                                                                                                                                                                           |
| Cognitive function or neurodevelopment | <p>Serial digit learning, Simple reaction time, Stanford-Binet IV Memory for Sentences; The Woodcock-Johnson III Tests of Cognitive Abilities (WJ-III)</p> <p>Verbal Comprehension; Raven's Colored Progressive Matrices; Archimedes spiral</p> <p>Chinese Binet test, arithmetic test, picture completion test, maze test, and cancellation test</p> <p>Gesell Developmental Schedules (GDS)</p> <p>NICU Network Neurobehavioral Scale (NNS)</p> <p>Mullen Scales of Early Learning; MacArthur-Bates Communicative Development Indices</p> <p>the Developmental Coordination Disorder Questionnaire</p> <p>2007 (DCDQ'07). Parent report</p> <p>Cultural fair intelligence tests (Cattell 2 test)</p> <p>Graham-Rosenblith Scale</p> <p>Wide Range Assessment of Memory and Learning (WRAML)</p> <p>Wechsler Preschool and Primary Scales of Intelligence-III (WPPSI-III)</p> | Non-occupational (children) | <p>Andersen H. et al, 2015; Krieg EF 2013;</p> <p>Rauh V. et al, 2015</p> <p>Wang N. et al, 2016</p> <p>Wang Y. et al, 2017; Guodong D. et al, 2012</p> <p>Yolton et al, 2013</p> <p>Pan I-J et al, 2009</p> <p>Høyer et al., 2015</p> <p>Hallit S. et al, 2019</p> <p>Bahena-Medina et al., 2011</p> <p>Orenstein S. et al, 2014;</p> <p>Furlong M. et al , 2017; Engel S. et al, 2011</p> <p>Ostrea EM et al, 2012</p> |

|                     |                                                                                                                                                                |                                      |                                         |
|---------------------|----------------------------------------------------------------------------------------------------------------------------------------------------------------|--------------------------------------|-----------------------------------------|
|                     | Griffiths Mental Developmental Scale                                                                                                                           |                                      |                                         |
| ASD                 | ADOS (Autism Diagnostic Observation Schedule), Social Communication Questionnaire (SCQ), Mullen Scales of Early Learning (MSEL)                                | Non-occupational (children, mothers) | Philippat C. et al, 2018                |
| Depression          | [Brief Symptom Inventory (BSI), Postpartum Bonding Questionnaire (PBQ), Mother-to-Infant Bonding Scale (MIBS) and Edinburgh Postnatal Depression Scale (EPDS)] |                                      | Yalçın S. et al, 2014                   |
|                     | Hospital Anxiety and Depression Scale                                                                                                                          |                                      |                                         |
|                     | Beck Anxiety (BAI)                                                                                                                                             |                                      | Harrison V., MacKenzie Ross S. 2016     |
|                     | Short-Form Geriatric Depression Scale (SGDS)                                                                                                                   |                                      |                                         |
|                     | Hillside Behavior Rating Scale                                                                                                                                 |                                      | Koh S-B. et al, 2017; Kim J et al, 2013 |
| Behavioral problems | Behavior Rating Inventory of Executive Functioning (BRIEF)                                                                                                     |                                      | Rowe C. et al, 2016                     |
|                     | Facial Expression Recognition Test                                                                                                                             |                                      | Furlong M. et al, 2017                  |
|                     |                                                                                                                                                                |                                      | Sagiv S. et al, 2018                    |
